# Supplementary material for: A zebrafish model for C9orf72 ALS reveals RNA toxicity as a pathogenic mechanism
Source: Springer Nature journal article supplement (doi:10.1007/s00401-017-1796-5), 2018-01-04
Supplement: MOESM1 [file 15344476]

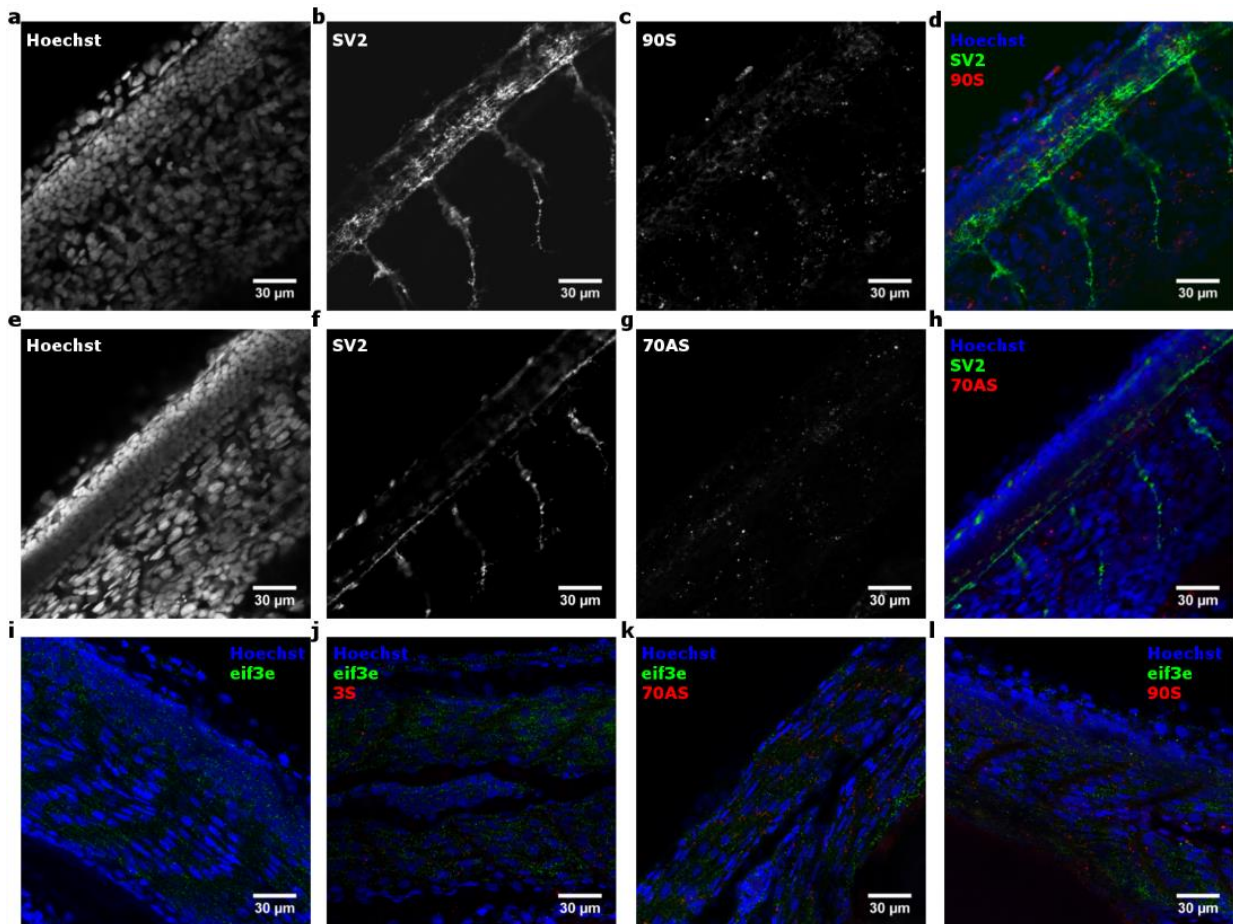

**Online Resource 1. Localization of sense and antisense repeat RNA.** (a,b,c,d) Whole mount immunohistochemistry (SV2 antibody, Hoechst) of 30 hpf zebrafish embryos injected with fluorescently labeled ~90S repeat RNA. (e,f,g,h) Whole mount immunohistochemistry (SV2 antibody, Hoechst) of 30 hpf zebrafish embryos injected with fluorescently labeled ~70AS repeat RNA. (i,j,k,l) Whole mount immunohistochemistry (eif3e antibody, Hoechst) of 30 hpf zebrafish embryos injected with 3S (j), ~70AS (k) or ~90S (l) and non-injected embryos (i).

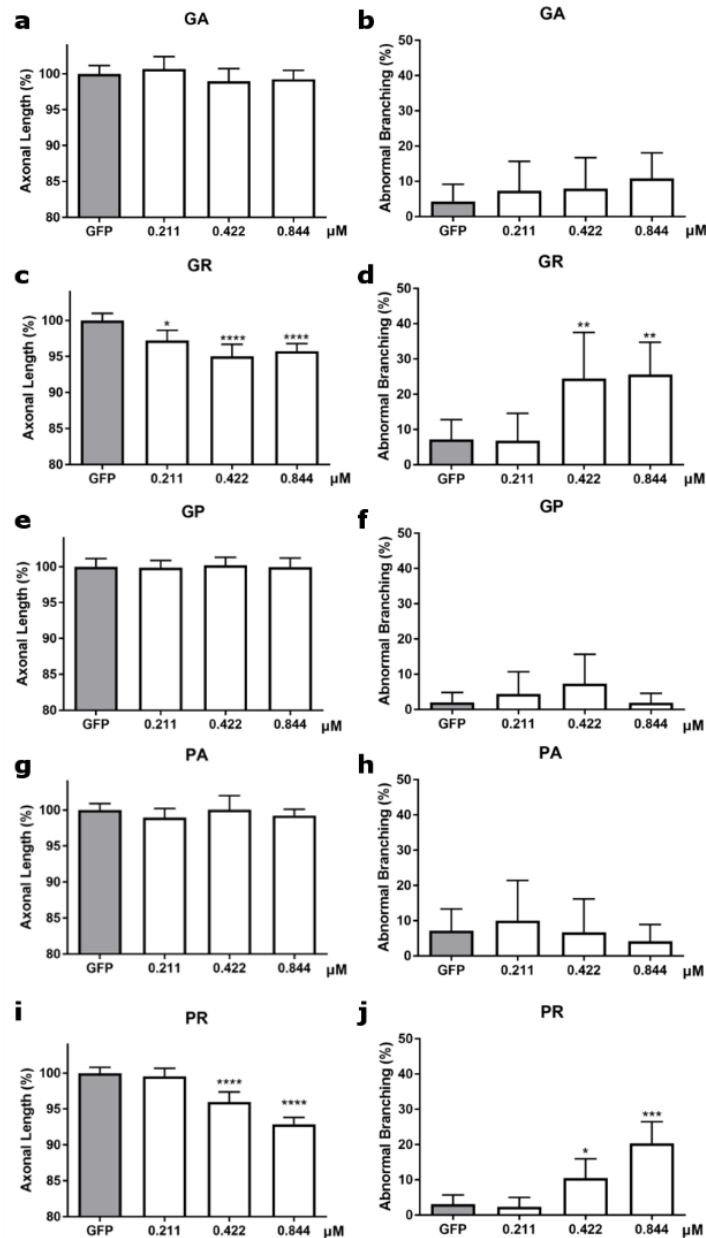

**Online Resource 2. Dose dependent toxicity of DPRs in zebrafish.** (a,b) Dose response of (GA)50 mRNA, compared to GFP condition (0.844  $\mu$ M) (n = 3 experiments). (a) Data represent mean  $\pm$  95% CI, one-way ANOVA,  $F(3, 220) = 0.9918$ . (b) Data represent mean  $\pm$  95% CI, logistic regression (z-values: 0.674, 1.184, 1.425). (c,d) Dose response of (GR)50 mRNA, compared to GFP condition (0.844  $\mu$ M) (n = 3 experiments). (c) Data represent mean  $\pm$  95% CI, one-way ANOVA,  $F(3, 258) = 14.83$ , \* $p < 0.05$ , \*\*\*\* $p < 0.0001$ . (d) Data represent mean  $\pm$  95% CI, logistic regression (z-values: -0.068, 2.623, 3.067), \*\* $p < 0.01$ . (e,f) Dose response of (GP)50 mRNA, compared to GFP condition (0.844  $\mu$ M) (n = 6 experiments). (e) Data represent mean  $\pm$  95% CI, one-way ANOVA,  $F(3, 287) = 0.02847$ . (f) Data represent mean  $\pm$  95% CI, logistic regression (z-values: 0.810, 1.451, -0.049). (g,h) Dose response of (PA)50 mRNA, compared to GFP condition (0.844  $\mu$ M) (n = 3 experiments). (g) Data represent mean  $\pm$  95% CI, one-way ANOVA,  $F(3, 198) = 0.8611$ . (h) Data represent mean  $\pm$  95% CI, logistic regression (z-values: 0.480, -0.086, -0.760). (i,j) Dose response of (PR)50 mRNA, compared to GFP condition (0.844  $\mu$ M) (n = 9 experiments). (i) Data represent mean  $\pm$  95% CI, one-way ANOVA,  $F(3, 585) = 43.84$ , \*\*\*\* $p < 0.0001$ . (j) Data represent mean  $\pm$  95% CI, logistic regression (z-values: -0.376, 2.432, 4.257), \* $p < 0.05$ , \*\*\* $p < 0.001$ .

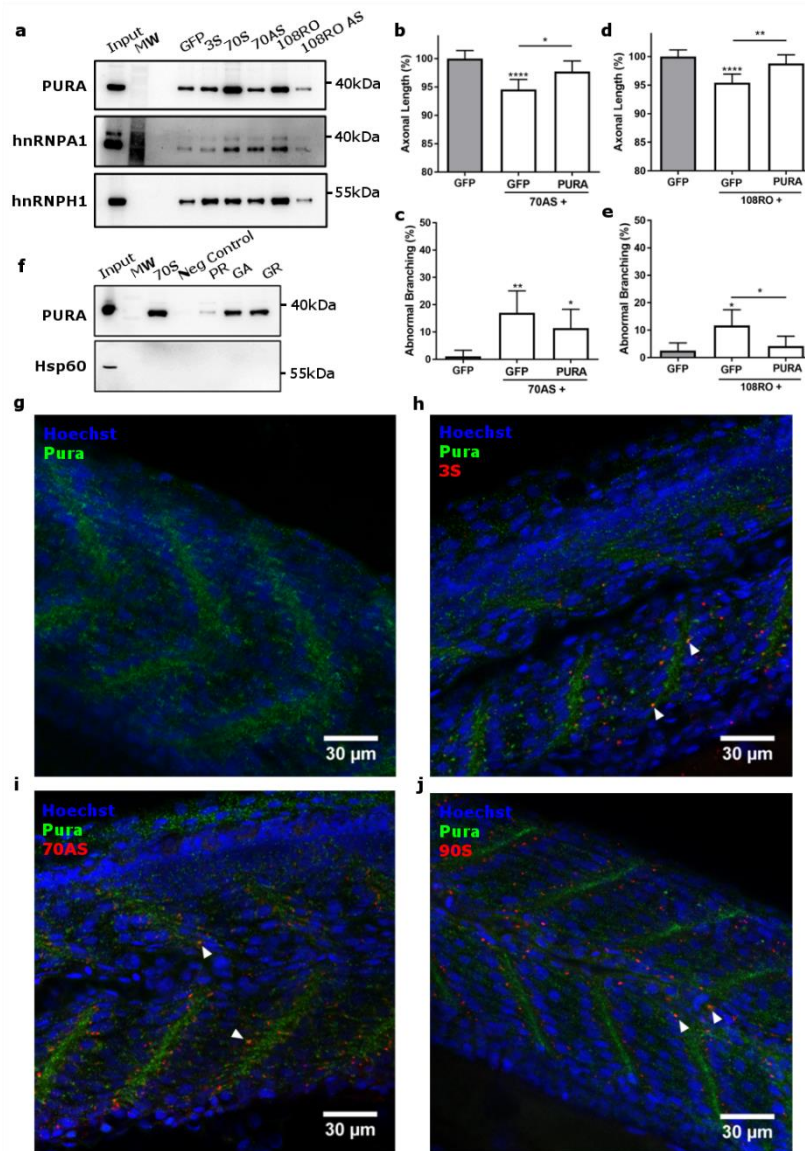

**Online Resource 3. Pura in zebrafish embryos.** (a) RNA pull-down from mouse brain lysate. Western blot analysis of Pur-alpha, hnRNPA1 and hnRNPH1, showing the binding affinity to different sense and antisense repeat RNAs, n = 2 biological replicates (Input = brain lysate, MW = molecular weight marker). (b,c) Effect of Pur-alpha (0.573 $\mu$ M) on ~70AS (0.844  $\mu$ M) axonal toxicity (n = 6 experiments). (b) Data represent mean  $\pm$  95% CI, one-way ANOVA, F(2, 262) = 10.52, \*p<0.05, \*\*\*\*p<0.0001. (c) Data represent mean  $\pm$  95% CI, logistic regression (z-values compared to GFP: 2.782, 2.308; 70AS + GFP vs 70AS + Pur-alpha: z-value = 1.043, p = 0.297), \*p<0.05, \*\*p<0.01. (d,e) Effect of Pur-alpha (0.573 $\mu$ M) on 108RO (0.844  $\mu$ M) axonal toxicity (n = 8 experiments). (d) Data represent mean  $\pm$  95% CI, one-way ANOVA, F(2, 357) = 10.89, \*\*p<0.01, \*\*\*\*p<0.0001. (e) Data represent mean  $\pm$  95% CI, logistic regression (z-values compared to GFP: 2.521, 0.712; 108RO + GFP vs 108RO + Pur-alpha: z-value = -2.065, p = 0.0389), \*p<0.05. (f) RNA pull-down from mouse brain lysate. Western blot analysis of Pur-alpha, showing the binding affinity to different DPR coding codon-optimized mRNAs, n = 2 biological replicates. (Input = brain lysate, MW = molecular weight marker, Negative Control = non-biotinylated ~70S repeat RNA). Hsp60 was used as negative control for the RNA pull-down. (g, h, i, j) Whole mount immunohistochemistry (pura antibody, Hoechst) of 30 hpf zebrafish embryos injected with 3S (h), ~70AS (i) or ~90S (j) and non-injected embryos (g). Arrowheads indicate sites of colocalization of pura with repeat RNA.

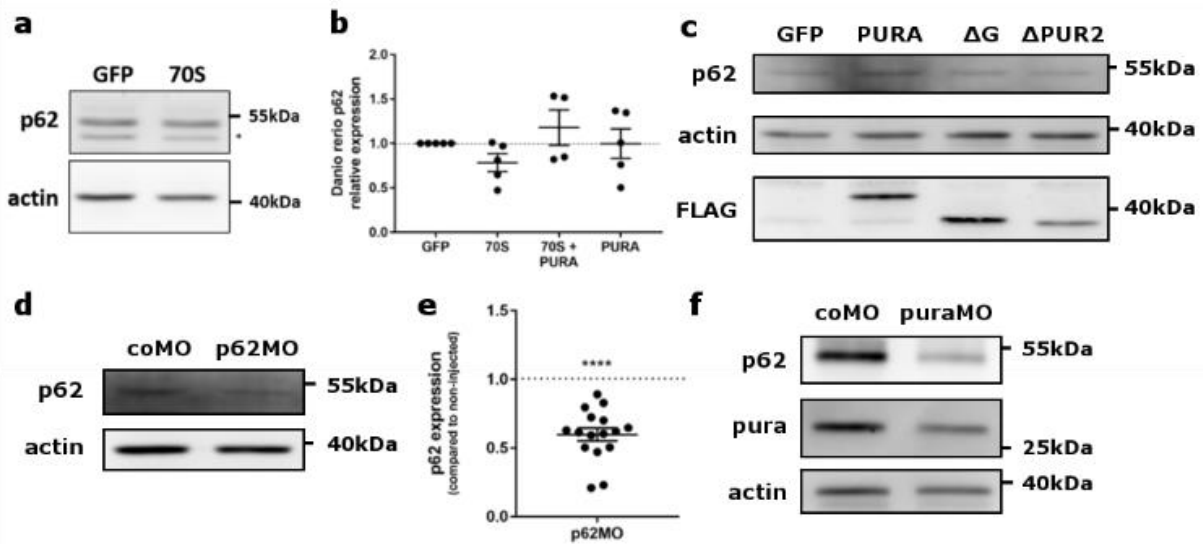

**Online Resource 4. p62 in zebrafish embryos.** (a) *Danio rerio* p62 protein levels in 30 hpf zebrafish embryos injected with equimolar amounts (0.844  $\mu$ M) of GFP or ~70S RNA as assessed by Western blot (n = 7 experiments) (\* aspecific band). (b) *Danio rerio* p62 mRNA levels in 30 hpf zebrafish embryos as assessed by qPCR. Data represent mean  $\pm$  SEM, statistics are compared to GFP condition, n = 5 experiments, one-way ANOVA,  $F(3, 15) = 1.437$ . (c) *Danio rerio* p62 protein levels in 30hpf zebrafish embryos upon overexpression of PURA,  $\Delta$ G or  $\Delta$ PUR2 as assessed by Western blot. Transgene expression was confirmed with FLAG antibody. (d) *Danio rerio* p62 protein levels in 30 hpf zebrafish embryos upon injection of p62 morpholino as assessed by Western blot (n = 16 experiments), quantification in (e). Data represent mean  $\pm$  SEM, statistics are compared to non-injected condition, ratio-paired t-test ( $t_{15} = 5.695$ ), \*\*\*\* $p < 0.0001$ . (f) *Danio rerio* p62 and pura protein levels in 30 hpf zebrafish embryos upon injection of pura morpholino as assessed by Western blot.
